# Supplementary material for: Voltage-induced chromatic phase transition in ferrocene substituted polydiacetylene thin films
Source: Royal Society of Chemistry journal article supplement (doi:10.1039/c3cc44467h), 2013-01-01
Supplement: c3cc44467h.pdf [file c3cc44467h.pdf]

# Voltage-induced chromatic phase transition in ferrocene substituted polydiacetylene thin film

Gang Zou<sup>a\*</sup>, Wenlong Hu<sup>a</sup>, Taguchi Dai<sup>b</sup>, Takaaki Manaka<sup>b\*</sup> and Mitsumasa Iwamoto<sup>b\*</sup>

<sup>a</sup>CAS Key Laboratory of Soft Matter Chemistry, Department of Polymer Science and Engineering, Key Laboratory of Optoelectronic Science and Technology in Anhui Province, University of Science and Technology of China, Hefei, Anhui 230026, P. R. China

E-mail: gangzou@ustc.edu.cn

<sup>b</sup>Department of physical electronics, Tokyo Institute of Technology, 2-12-1, O-okayama, Meguro-ku, Tokyo 152-8552, Japan

E-mail: manaka.t.aa@m.titech.ac.jp, iwamoto@pe.titech.ac.jp

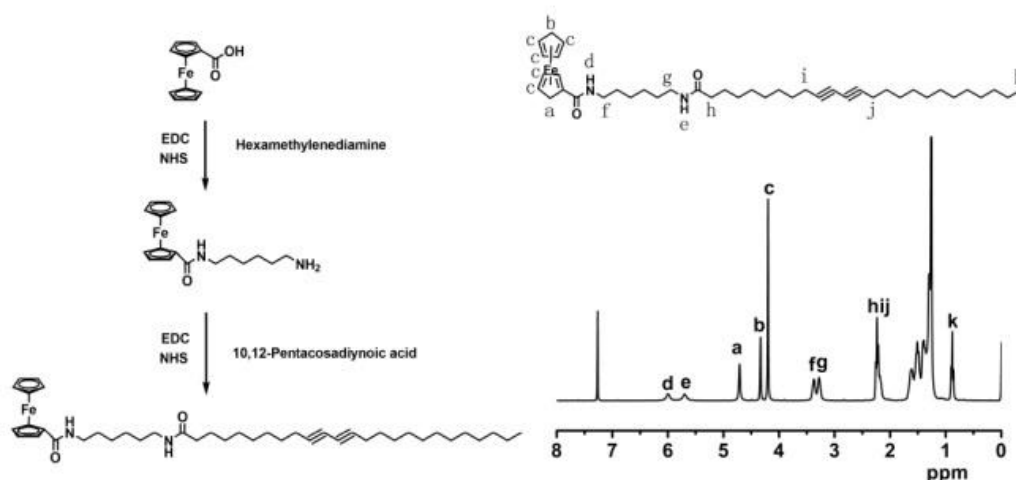

Fig. S1 The molecular structure, synthetic route and <sup>1</sup>H NMR characterization of FEDA.

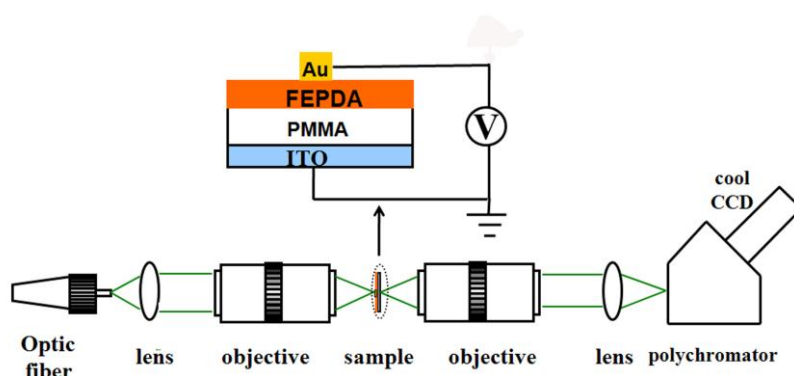

Fig. S2 The optical setup of the CMS experiments for the in situ evaluation of the voltage-induced chromatic phase transition in FEPDA samples. External voltages are applied using a source meter to observe the charge modulation of the optical signal. Detailed sample structure is also described.

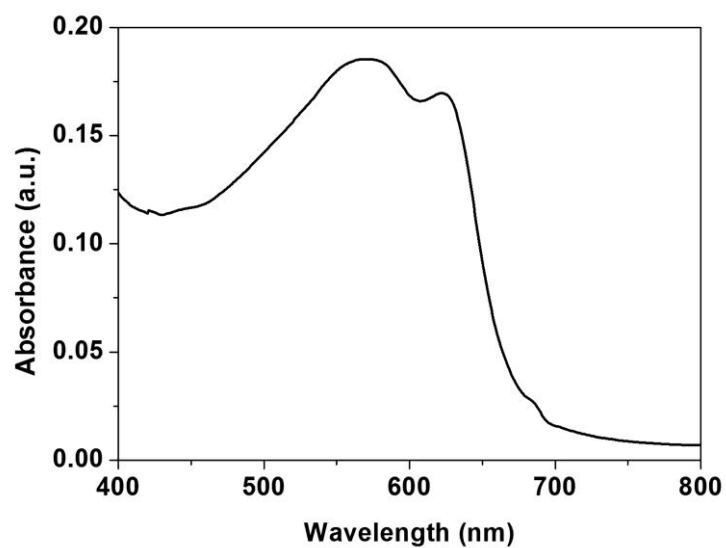

Fig. S3 The typical UV-vis absorption spectra of the FEPDA samples in blue phase.

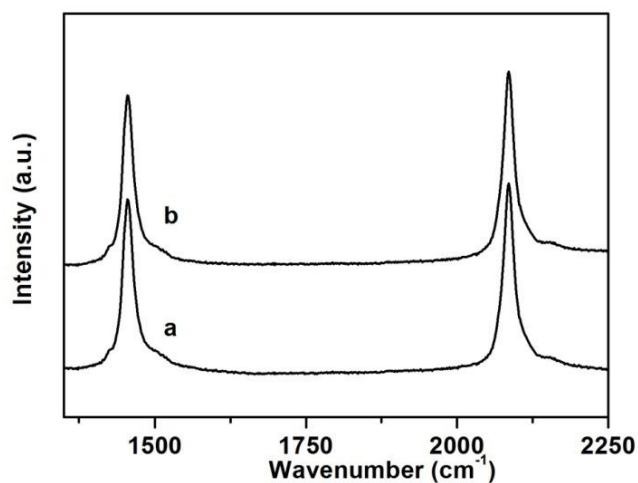

Fig. S4 The typical Raman spectra of the FEPDA samples: (a) before and (b) after the application of the negative bias voltage.

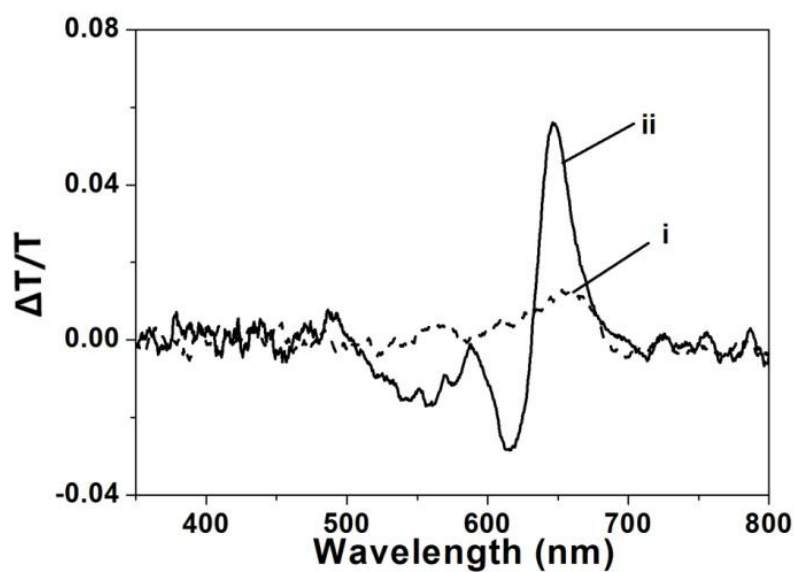

Fig. S5 CMS spectrum for (i) pure PDA sample and (ii) the FEPDA samples obtained the application of -60 V, respectively.

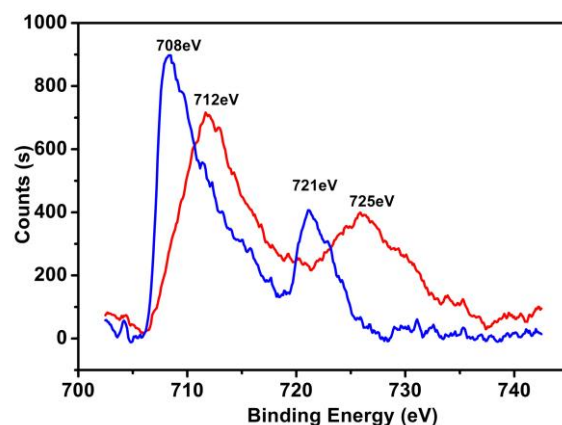

**Fig.S6** XPS of FEPDA sample before (blue) and after (red) the application of a negative voltage.

The xps peak of Fe2P shifted to a higher energy position after the application of a negative voltage. The peak of Fe2P<sub>3/2</sub> shifted from 708eV to 712eV. And the peak of Fe2P<sub>3/2</sub> shifted from 721eV to 725eV. It indicated that ferrocene was oxidized from Fe(II) to Fe(III)<sup>1,2</sup>.

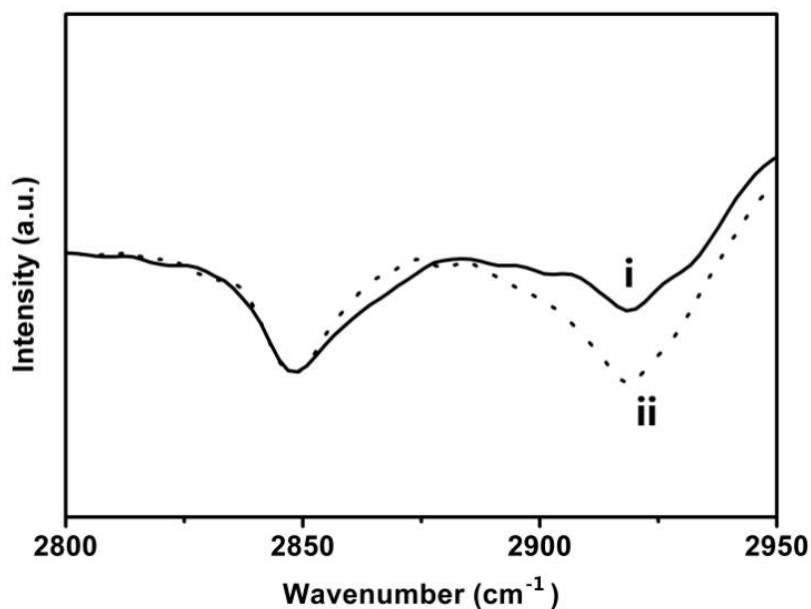

**Fig. S7** Transimission FTIR spectra of FEPDA samples (i) before and (ii) after the application of the negative bias voltages.

1. A. W. Taylor and P. Licence, *ChemPhysChem*. 2012, **13**, 1917.
2. T. Kitagawa, H. Matsubara, K. Komatsu, K. Hirai, T. Okazaki and T. Hase, *Langmuir* 2013,**29**,4275
